# Supplementary material for: A Review of fMRI Simulation Studies
Source: PubMed Central journal article supplement (PMC4105464; doi:10.1371/journal.pone.0101953), 2014-07-21
Supplement: pone.0101953.s001.pdf [file pone.0101953.s001.pdf]

- [1] Afshin-Pour B, Soltanian-Zadeh H, Hossein-Zadeh GA, Grady C, Strother S (2011) A mutual information-based metric for evaluation of fMRI data-processing approaches. *Human Brain Mapping* 32: 699–715.
- [2] Allen E, Erhardt E, Wei Y, Eichele T, Calhoun V (2012) Capturing inter-subject variability with group independent component analysis of fMRI data: A simulation study. *NeuroImage* 59: 4141–59.
- [3] Andrade A, Kherif F, Mangin J, Worsley K, Paradis A, et al. (2001) Detection of fMRI activation using cortical surface mapping. *Human Brain Mapping* 12: 79–93.
- [4] Backfrieder W, Baumgartner R, Sámal M, Moser E, Bergmann H (1996) Quantification of intensity variations in functional MR images using rotated principal components. *Physics in Medicine and Biology* 41: 1425–1438.
- [5] Bai P, Shen H, Huang X, Truong Y (2008) A supervised singular value decomposition for independent component analysis of fMRI. *Statistica Sinica* 18: 1233–1252.
- [6] Bellec P, Perlberg V, Evans A (2009) Bootstrap generation and evaluation of an fMRI simulation database. *Magnetic Resonance Imaging* 27: 1382–1396.
- [7] Bellec P, Rosa-Neto P, Lyttelton O, Benali H, Evans A (2010) Multi-level bootstrap analysis of stable clusters in resting-state fMRI. *NeuroImage* 51: 1126–1139.
- [8] Birn R, Cox R, Bandettini P (2004) Experimental designs and processing strategies for fMRI studies involving overt verbal responses. *NeuroImage* 23: 1046–1058.
- [9] Biswal B, Ulmer J (1999) Blind source separation of multiple signal sources of fMRI data sets using independent component analysis. *Journal Of Computer Assisted Tomography* 23: 265–271.
- [10] Brezger A, Fahrmeir L, Hennerfeind A (2007) Adaptive Gaussian Markov random fields with applications in human brain mapping. *Journal of the Royal Statistical Society: Series C (Applied Statistics)* 56: 327–345.

- [11] Cabella B, Sturzbecher M, Tedeschi W, Baffa Filho O, de Araa D, et al. (2008) A numerical study of the Kullback-Leibler distance in functional magnetic resonance imaging. *Brazilian Journal of Physics* 38: 20 – 25.
- [12] Cabella B, Sturzbecher M, De Araujo D, Neves U (2009) Generalized relative entropy in functional magnetic resonance imaging. *Physica A: Statistical Mechanics and its Applications* 388: 41–50.
- [13] Calhoun V, Adali T (2006) Complex infomax: Convergence and approximation of Infomax with complex nonlinearities. *Journal of VLSI Signal Processing Systems for Signal Image and Video Technology* 44: 173-190.
- [14] Calhoun V, Stevens M, Pearlson G, Kiehl K (2004) fMRI analysis with the general linear model: removal of latency-induced amplitude bias by incorporation of hemodynamic derivative terms. *NeuroImage* 22: 252–257.
- [15] Calhoun V, Adali T, Stevens M, Kiehl K, Pekar J (2005) Semi-blind ICA of fMRI: A method for utilizing hypothesis-derived time courses in a spatial ICA analysis. *NeuroImage* 25: 527–538.
- [16] Casanova R, Ryali S, Serences J, Yang L, Kraft R, et al. (2008) The impact of temporal regularization on estimates of the BOLD hemodynamic response function: a comparative analysis. *NeuroImage* 40: 1606–1618.
- [17] Casanova R, Yang L, Hairston W, Laurienti P, Maldjian J (2009) Evaluating the impact of spatio-temporal smoothness constraints on the BOLD hemodynamic response function estimation: an analysis based on Tikhonov regularization. *Physiological Measurement* 30: N37–N51.
- [18] Chen H, Yuan H, Yao D, Chen L, Chen W (2006) An integrated neighborhood correlation and hierarchical clustering approach of functional MRI. *IEEE Transactions on Biomedical Engineering* 53: 452–458.
- [19] Chen H, Yao D (2004) Discussion on the choice of separated components in fMRI data analysis by spatial independent component analysis. *Magnetic Resonance Imaging* 22: 827–833.

- [20] Chen H, Yao D, Zhuo Y, Chen L (2003) Analysis of fMRI data by blind separation of data in a tiny spatial domain into independent temporal component. *Brain Topography* 15: 223–232.
- [21] Chen NK, Dickey C, Yoo SS, Guttman C, Panych L (2003) Selection of voxel size and slice orientation for fMRI in the presence of susceptibility field gradients: application to imaging of the amygdala. *NeuroImage* 19: 817–825.
- [22] Churchill N, Yourganov G, Oder A, Tam F, Graham S, et al. (2012) Optimizing Preprocessing and Analysis Pipelines for Single-Subject fMRI: 2. Interactions with ICA, PCA, Task Contrast and Inter-Subject Heterogeneity. *PLoS ONE* 7: e31147.
- [23] De Martino F, Valente G, Staeren N, Ashburner J, Goebel R, et al. (2008) Combining multivariate voxel selection and support vector machines for mapping and classification of fMRI spatial patterns. *NeuroImage* 43: 44–58.
- [24] De Mazière P, Van Hulle M (2007) fMRI bold signal analysis using a novel nonparametric statistical method. *Journal of Magnetic Resonance* 185: 138–151.
- [25] Den Dekker A, Poot D, Bos R, Sijbers J (2009) Likelihood-based hypothesis tests for brain activation detection from MRI data disturbed by colored noise: a simulation study. *IEEE Transactions on Medical Imaging* 28: 287–296.
- [26] Desco M, Hernandez J, Santos A, Brammer M (2001) Multiresolution analysis in fMRI: sensitivity and specificity in the detection of brain activation. *Human Brain Mapping* 14: 16–27.
- [27] Deshpande G, Sathian K, Hu X (2010) Assessing and Compensating for Zero-Lag Correlation Effects in Time-Lagged Granger Causality Analysis of fMRI. *IEEE Transactions on Biomedical Engineering* 57: 1446–1456.
- [28] Desmond J, Glover G (2002) Estimating sample size in functional MRI (fMRI) neuroimaging studies: statistical power analyses. *Journal of Neuroscience Methods* 118: 115–128.

- [29] Dimitriadou E, Barth M, Windischberger C, Hornik K, Moser E (2004) A quantitative comparison of functional MRI cluster analysis. *Artificial Intelligence in Medicine* 31: 57–71.
- [30] Esposito F, Goebel R (2011) Extracting functional networks with spatial independent component analysis: the role of dimensionality, reliability and aggregation scheme. *Current Opinion in Neurology* 24: 378–385.
- [31] Fadili M, Ruan S, Bloyet D, Mazoyer B (2001) On the number of clusters and the fuzziness index for unsupervised FCA application to BOLD fMRI time series. *Medical Image Analysis* 5: 55–67.
- [32] Sun F, Morris D, Lee W, Taylor M, Mills T, et al. (2010) Feature-Space-Based fMRI Analysis Using the Optimal Linear Transformation. *Information Technology in Biomedicine, IEEE Transactions on* 14: 1279–1290.
- [33] Gavrilescu M, Shaw M, Stuart G, Eckersley P, Svalbe I, et al. (2002) Simulation of the effects of global normalization procedures in functional MRI. *NeuroImage* 17: 532–542.
- [34] Goebel R, Roebroeck A, Kim DS, Formisano E (2003) Investigating directed cortical interactions in time-resolved fMRI data using vector autoregressive modeling and Granger causality mapping. *Magnetic Resonance Imaging* 21: 1251–1261.
- [35] Gorgolewski K, Storkey A, Bastin M, Pernet C (2012) Adaptive thresholding for reliable topological inference in single subject fMRI analysis. *Frontiers in Human Neuroscience* 6.
- [36] Grinband J, Wager T, Lindquist M, Ferrera V, Hirsch J (2008) Detection of time-varying signals in event-related fMRI designs. *NeuroImage* 43: 509–520.
- [37] Groves A, Chappell M, Woolrich M (2009) Combined spatial and non-spatial prior for inference on MRI time-series. *NeuroImage* 45: 795–809.

- [38] Gu H, Engelien W, Feng H, Silbersweig D, Stern E, et al. (2001) Mapping transient, randomly occurring neuropsychological events using independent component analysis. *NeuroImage* 14: 1432–1443.
- [39] Guo Y (2010) A weighted cluster kernel PCA prediction model for multi-subject brain imaging data. *Statistics and Its Interface* 3: 103–111.
- [40] Guo Y, DuBois Bowman F (2008) Modeling dose-dependent neural processing responses using mixed effects spline models: with application to a PET study of ethanol. *NeuroImage* 40: 698–711.
- [41] Heller R, Stanley D, Yekutieli D, Rubin N, Benjamini Y (2006) Cluster-based analysis of fMRI data. *NeuroImage* 33: 599–608.
- [42] Hu D, Yan L, Liu Y, Zhou Z, Friston K, et al. (2005) Unified SPM-ICA for fMRI analysis. *NeuroImage* 25: 746–755.
- [43] Huang L, Thompson E, Schmithorst V, Holland S, Talavage T (2009) Partially adaptive STAP algorithm approaches to functional MRI. *IEEE Transactions on Biomedical Engineering* 56: 518–521.
- [44] Jahanian H, Hossein-Zadeh GA, Soltanian-Zadeh H, Ardekani B (2004) Controlling the false positive rate in fuzzy clustering using randomization: application to fMRI activation detection. *Magnetic Resonance Imaging* 22: 631–638.
- [45] Joel S, Caffo B, Van Zijl P, Pekar J (2011) On the relationship between seed-based and ICA-based measures of functional connectivity. *Magnetic Resonance in Medicine* 66: 644–657.
- [46] Johnston L, Duff E, Mareels I, Egan G (2008) Nonlinear estimation of the BOLD signal. *NeuroImage* 40: 504–514.
- [47] Kadah Y (2004) Adaptive denoising of event-related functional magnetic resonance imaging data using spectral subtraction. *IEEE Transactions on Biomedical Engineering* 51: 1944–1953.
- [48] Kang H, Ombao H, Linkletter C, Long N, Badre D (2012) Spatio-Spectral Mixed-Effects Model for Functional Magnetic Resonance Imaging Data. *Journal of the American Statistical Association* 107: 568–577.

- [49] Kim B, Yeo D, Bhagalia R (2008) Comprehensive mathematical simulation of functional magnetic resonance imaging time series including motion-related image distortion and spin saturation effect. *Magnetic Resonance Imaging* 26: 147–159.
- [50] Kim E, Han Y, Park H (2011) New fMRI analysis method for multiple stimuli using reference estimation. *International Journal of Imaging Systems and Technology* 21: 315–322.
- [51] Lee JM, Hu J, Gao J, Crosson B, Peck K, et al. (2008) Discriminating brain activity from task-related artifacts in functional MRI: fractal scaling analysis simulation and application. *NeuroImage* 40: 197–212.
- [52] Lee K, Tak S, Ye J (2011) A Data-Driven Sparse GLM for fMRI Analysis Using Sparse Dictionary Learning With MDL Criterion. *IEEE Transactions on Medical Imaging* 30: 1076–1089.
- [53] Lee S, Shen H, Truong Y, Lewis M, Huang X (2011) Independent Component Analysis Involving Autocorrelated Sources With an Application to Functional Magnetic Resonance Imaging. *Journal of the American Statistical Association* 106: 1009–1024.
- [54] Lei X, Qiu C, Xu P, Yao D (2010) A parallel framework for simultaneous EEG/fMRI analysis: methodology and simulation. *NeuroImage* 52: 1123–1134.
- [55] LeVan P, Gotman J (2009) Independent component analysis as a model-free approach for the detection of BOLD changes related to epileptic spikes: a simulation study. *Human Brain Mapping* 30: 2021–31.
- [56] Liao R, Krolik J, McKeown M (2005) An information-theoretic criterion for intrasubject alignment of fMRI time series: motion corrected independent component analysis. *IEEE Transactions on Medical Imaging* 24: 29–44.
- [57] Liao R, McKeown M, Krolik J (2006) Isolation and minimization of head motion-induced signal variations in fMRI data using independent component analysis. *Magnetic Resonance in Medicine* 55: 1396–1413.

- [58] Liao W, Chen H, Yang Q, Lei X (2008) Analysis of fMRI Data Using Improved Self-Organizing Mapping and Spatio-Temporal Metric Hierarchical Clustering. *IEEE Transactions on Medical Imaging* 27: 1472–1483.
- [59] Lindquist M, Wager T (2008) Spatial smoothing in fMRI using prolate spheroidal wave functions. *Human Brain Mapping* 29: 1276–1287.
- [60] Lindquist M, Waugh C, Wager T (2007) Modeling state-related fMRI activity using change-point theory. *NeuroImage* 35: 1125–1141.
- [61] Lin FH, Huang TY, Chen NK, Wang FN, Stufflebeam S, et al. (2005) Functional MRI using regularized parallel imaging acquisition. *Magnetic Resonance in Medicine* 54: 343–353.
- [62] Lin FH, McIntosh A, Agnew J, Eden G, Zeffiro T, et al. (2003) Multivariate analysis of neuronal interactions in the generalized partial least squares framework: simulations and empirical studies. *NeuroImage* 20: 625–642.
- [63] Lin QH, Liu J, Zheng YR, Liang H, Calhoun V (2010) Semiblind spatial ICA of fMRI using spatial constraints. *Human Brain Mapping* 31: 1076–1088.
- [64] Li Y, Gilmore J, Wang J, Styner M, Lin W, et al. (2012) TwinMARM: two-stage multiscale adaptive regression methods for twin neuroimaging data. *IEEE Transactions on Medical Imaging* 31: 1100–12.
- [65] Li Y, Zhu H, Shen D, Lin W, Gilmore J, et al. (2011) Multiscale Adaptive Regression Models for Neuroimaging Data. *Journal of the Royal Statistical Society Series B Statistical methodology* 73: 559–578.
- [66] Logan B, Rowe D (2004) An evaluation of thresholding techniques in fMRI analysis. *NeuroImage* 22: 95–108.
- [67] Loh J, Lindquist M, Wager T (2008) Residual analysis for detecting mis-modeling in fMRI. *Statistica Sinica* 18: 1421–1448.
- [68] Long Z, Chen K, Wu X, Reiman E, Peng D, et al. (2009) Improved application of independent component analysis to functional magnetic resonance imaging study via linear projection techniques. *Human Brain Mapping* 30: 417–431.

- [69] Lowe M, Russell D (1999) Treatment of baseline drifts in fMRI time series analysis. *Journal Of Computer Assisted Tomography* 23: 463–473.
- [70] Lu N, Shan BC, Li K, Yan B, Wang W, et al. (2006) Improved temporal clustering analysis method for detecting multiple response peaks in fMRI. *Journal of Magnetic Resonance Imaging* 23: 285–290.
- [71] Luo S Hand Puthusserypady (2006) Spatio-temporal modeling and analysis of fMRI data using NARX neural network. *International Journal of Neural Systems* 16: 139–149.
- [72] MacIntosh B, Baker S, Mraz R, Ives J, Martel A, et al. (2007) Improving functional magnetic resonance imaging motor studies through simultaneous electromyography recordings. *Human Brain Mapping* 28: 835–845.
- [73] Marrelec G, Benali H, Ciuciu P, Péligrini-Issac M, Poline JB (2003) Robust Bayesian estimation of the hemodynamic response function in event-related BOLD fMRI using basic physiological information. *Human Brain Mapping* 19: 1–17.
- [74] Moosmann M, Eichele T, Nordby H, Hugdahl K, Calhoun V (2008) Joint independent component analysis for simultaneous EEG-fMRI: principle and simulation. *International Journal of Psychophysiology* 67: 212–221.
- [75] Müller K, Neumann J, Grigutsch M, Von Cramon D, Lohmann G (2007) Detecting groups of coherent voxels in functional MRI data using spectral analysis and replicator dynamics. *Journal of Magnetic Resonance Imaging* 26: 1642–1650.
- [76] Nan F, Nowak R (1999) Generalized likelihood ratio detection for fMRI using complex data. *IEEE Transactions on Medical Imaging* 18: 320–329.
- [77] Ngan S, Auffermann W, Sarkar S, Hu X (2001) Activation detection in event-related fMRI data based on spatio-temporal properties. *Magnetic Resonance Imaging* 19: 1149–1158.



- [78] Park J, Shedden K, Polk T (2012) Correlation and heritability in neuroimaging datasets: a spatial decomposition approach with application to an fMRI study of twins. *NeuroImage* 59: 1132–42.
- [79] Parrish T, Gitelman D, LaBar K, Mesulam M (2000) Impact of signal-to-noise on functional MRI. *Magnetic Resonance in Medicine* 44: 925–932.
- [80] Pendse G, Borsook D, Becerra L (2009) Enhanced false discovery rate using Gaussian mixture models for thresholding fMRI statistical maps. *NeuroImage* 47: 231–261.
- [81] Penny W (2011) Comparing Dynamic Causal Models using AIC, BIC and Free Energy. *NeuroImage* 59: 319–330.
- [82] Puthusserypady S, Ratnarajah T, Jue R (2010) Robust Estimation of HDR in fMRI using H-Filters. *IEEE Transactions on Biomedical Engineering* 57: 1133–1142.
- [83] Quirós A, Diez R, Gamerman D (2010) Bayesian spatiotemporal model of fMRI data. *NeuroImage* 49: 442–456.
- [84] Quirós A, Diez R, Wilson S (2010) Bayesian spatiotemporal model of fMRI data using transfer functions. *NeuroImage* 52: 995–1004.
- [85] Rodriguez P (2010) Using conditional maximization to determine hyperparameters in model-based fMRI. *NeuroImage* 50: 472–478.
- [86] Ryali S, Supekar K, Chen T, Menon V (2011) Multivariate dynamical systems models for estimating causal interactions in fMRI. *NeuroImage* 54: 807–823.
- [87] Salli E, Aronen H, Savolainen S, Korvenoja A, Visa A (2001) Contextual clustering for analysis of functional MRI data. *IEEE Transactions on Medical Imaging* 20: 403–414.
- [88] Sato J, Junior E, Takahashi D, De Maria Felix M, Brammer M, et al. (2006) A method to produce evolving functional connectivity maps during the course of an fMRI experiment using wavelet-based time-varying Granger causality. *NeuroImage* 31: 187–196.

- [89] Sato J, Mourão Miranda J, Morais Martin M, Amaro E, Morettin P, et al. (2008) The impact of functional connectivity changes on support vector machines mapping of fMRI data. *Journal of Neuroscience Methods* 172: 94–104.
- [90] Schippers M, Renken R, Keysers C (2011) The effect of intra- and inter-subject variability of hemodynamic responses on group level Granger causality analyses. *NeuroImage* 57: 22–36.
- [91] Schmithorst V (2009) Higher-order contrast functions improve performance of independent component analysis of fMRI data. *Journal of Magnetic Resonance Imaging* 29: 242–249.
- [92] Schmithorst V, Holland S (2004) Comparison of three methods for generating group statistical inferences from independent component analysis of functional magnetic resonance imaging data. *Journal of Magnetic Resonance Imaging* 19: 365–368.
- [93] Sijbers J, den Dekker A (2004) Generalized likelihood ratio tests for complex fMRI data. *Medical Imaging 2004: Physiology, Function, and Structure from Medical Images* 5: 652-663.
- [94] Sijbers J, den Dekker A, Bos R (2005) A likelihood ratio test for functional MRI data analysis to account for colored noise. *Advanced Concepts for Intelligent Vision Systems* 3708: 538-546.
- [95] Sijbers J, Den Dekker AJ (2005) Generalized likelihood ratio tests for complex fMRI data: a Simulation study. *IEEE Transactions on Medical Imaging* 24: 604–611.
- [96] Stephan K, Kasper L, Harrison L, Daunizeau J, Den Ouden H, et al. (2008) Nonlinear dynamic causal models for fMRI. *NeuroImage* 42: 649–662.
- [97] Sturzbecher M, Tedeschi W, Cabella B, Baffa O, Neves U, et al. (2009) Non-extensive entropy and the extraction of BOLD spatial information in event-related functional MRI. *Physics in Medicine and Biology* 54: 161–174.

- [98] Suckling J, Bullmore E (2004) Permutation tests for factorially designed neuroimaging experiments. *Human Brain Mapping* 22: 193–205.
- [99] Sun F, Morris D, Babyn P (2009) The optimal linear transformation-based fMRI feature space analysis. *Medical & Biological Engineering & Computing* 47: 1119–1129.
- [100] Tabelow K, Polzehl J, Ulug A, Dyke J, Watts R, et al. (2008) Accurate Localization of Brain Activity in Presurgical fMRI by Structure Adaptive Smoothing. *IEEE Transactions on Medical Imaging* 27: 531–537.
- [101] Thompson E (2006) A parallel approach to STAP implementation for fMRI data. *Journal of Magnetic Resonance Imaging* 23: 216–221.
- [102] Thompson E, Holland S, Schmithorst V (2004) A STAP algorithm approach to fMRI: a simulation study. *Journal of Magnetic Resonance Imaging* 20: 715–722.
- [103] Vahdat S, Maneshi M, Grova C, Gotman J, Milner T (2012) Shared and Specific Independent Components Analysis for Between-Group Comparison. *Neural Computation* 24: 3052–3090.
- [104] Valdés-Sosa P, Sánchez-Bornot J, Lage-Castellanos A, Vega-Hernández M, Bosch-Bayard J, et al. (2005) Estimating brain functional connectivity with sparse multivariate autoregression. *Philosophical Transactions of the Royal Society of London - Series B: Biological Sciences* 360: 969–981.
- [105] Valente G, De Martino F, Filosa G, Balsi M, Formisano E (2009) Optimizing ICA in fMRI using information on spatial regularities of the sources. *Magnetic Resonance Imaging* 27: 1110–1119.
- [106] Vincent T, Risser L, Ciuciu P (2010) Spatially adaptive mixture modeling for analysis of FMRI time series. *IEEE Transactions on Medical Imaging* 29: 1059–1074.
- [107] Visscher K, Miezin F, Kelly J, Buckner R, Donaldson D, et al. (2003) Mixed blocked/event-related designs separate transient and sustained activity in fMRI. *NeuroImage* 19: 1694–1708.

- [108] Wager T, Keller M, Lacey S, Jonides J (2005) Increased sensitivity in neuroimaging analyses using robust regression. *NeuroImage* 26: 99–113.
- [109] Wang Z (2009) A hybrid SVM-GLM approach for fMRI data analysis. *NeuroImage* 46: 608–615.
- [110] Weeda W, Waldorp L, Christoffels I, Huizenga H (2009) Activated region fitting: a robust high-power method for fMRI analysis using parameterized regions of activation. *Human Brain Mapping* 30: 2595–2605.
- [111] Weeda W, Waldorp L, Grasman R, Van Gaal S, Huizenga H (2011) Functional connectivity analysis of fMRI data using parameterized regions-of-interest. *NeuroImage* 54: 410–416.
- [112] Worsley K, Poline J, Friston K, Evans A (1997) Characterizing the response of PET and fMRI data using multivariate linear models. *NeuroImage* 6: 305–319.
- [113] Xie X, Cao Z, Weng X, Jin D (2009) Estimating intrinsic dimensionality of fMRI dataset incorporating an AR(1) noise model with cubic spline interpolation. *Neurocomputing* 72: 1042–1055.
- [114] Yue Y, Loh J, Lindquist M (2010) Adaptive spatial smoothing of fMRI images. *Statistics and Its Interface* 3: 3–13.
- [115] Zhang C (2010) Statistical inference of minimum BD estimators and classifiers for varying-dimensional models. *Journal of Multivariate Analysis* 101: 1574 – 1593.
- [116] Zhang C, Yu T (2008) Semiparametric detection of significant activation for brain fMRI. *Annals of Statistics* 36: 1693–1725.
- [117] Zhang C, Lu Y, Johnstone T, Oakes T, Davidson R (2008) Efficient modeling and inference for event-related fMRI data. *Computational Statistics & Data Analysis* 52: 4859–4871.
- [118] Zhang J, Tuo X, Yuan Z, Liao W, Chen H (2011) Analysis of fMRI Data Using an Integrated Principal Component Analysis and Supervised Affinity Propagation Clustering Approach. *IEEE Transactions on Biomedical Engineering* 58: 3184–3196.

- [119] Zhang T, Li F, Beckes L, Brown C, Coan J (2012) Nonparametric inference of the hemodynamic response using multi-subject fMRI data. *NeuroImage* 63: 1754-1765.
